# Supplementary material
Source: PubMed Central journal article supplement (PMC4273403)
Supplement: pnas.201417527SI.pdf [file pnas.201417527SI.pdf]

# Supporting Information

Brown and Boeger 10.1073/pnas.1417527111

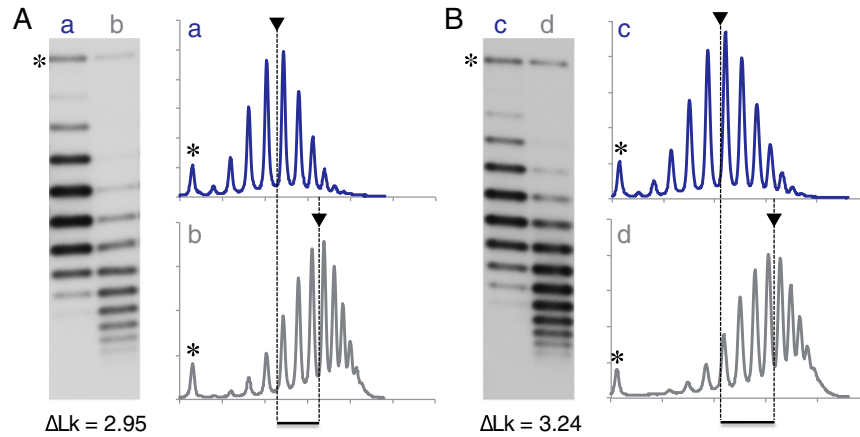

**Fig. S1.** Topoisomer distributions of gene rings. (A) Topoisomer distributions of double-promoter *PHO5* gene rings isolated from (a) yM192.1[pSH17] or (b) yM193.4[pSH17] cells; cells were grown in Erlenmeyer flasks with constant shaking. Topoisomers were prepared, separated by agarose gel electrophoresis, blotted, and hybridized with a radiolabeled *PHO5* probe as previously described (1). The blot's autoradiography is shown in *Left*; graphs in *Right* are intensity scans across the respective lane of the gel. A black triangle indicates the distribution center (1). The distance between the distribution centers (black horizontal bar; i.e., the linking difference) of rings isolated from (b) induced and (a) noninduced cells falls short of the difference expected from measurements with single-promoter rings (viz.,  $2 \times 1.85 = 3.7$ ) (1, 2), suggesting competition between the two promoter copies because of close proximity on the ring. (B) Topoisomer distributions of double-promoter *PHO5* gene rings isolated from (c) yM183.1[pSH17] or (d) yM184.26[pSH17] cells; rings bore an ~500-bp fragment from the ORF of *HMG2* between the two promoter copies. The increased separation between both copies resulted in an increase in linking difference between (d) induced and (c) noninduced rings, which was predicted by the hypothesis of competition by proximity. Indicated linking differences ( $\Delta Lk$ ) are averages from (A) three or (B) four independent experiments. \*Positions of the nicked rings.

1. Boeger H, Griesenbeck J, Strattan JS, Kornberg RD (2003) Nucleosomes unfold completely at a transcriptionally active promoter. *Mol Cell* 11(6):1587–1598.
2. Mao C, et al. (2010) Quantitative analysis of the transcription control mechanism. *Mol Syst Biol* 6:431.
